# Supplementary material for: Feedstock-dependent nitrogen configurations of nitrogen-doped single-walled carbon nanotubes in a CVD process
Source: Royal Society of Chemistry journal article supplement (doi:10.1039/c8nr02850h), 2018-01-01
Supplement: c8nr02850h1.pdf [file c8nr02850h1.pdf]

**Electronic Supplementary Information (ESI)**

**Feedstock-Dependent Nitrogen Configurations of  
Nitrogen-Doped Single-Walled Carbon Nanotubes in CVD  
Process**

Theerapol Thurakitsee,<sup>\*a</sup> Christian Kramberger,<sup>b</sup> Shigeo Maruyama<sup>\*c,d</sup>

<sup>a</sup>Program in Applied Physics, Maejo University, Chiang Mai, 50290 Thailand, <sup>b</sup>Faculty of Physics, Technische Universität Wien, Vienna, 1040 Austria, <sup>c</sup>Department of Mechanical Engineering, University of Tokyo, Tokyo, 113-8656 Japan, <sup>d</sup>National Institute of Advanced Industrial Science and Technology, Tsukuba, 305-8564 Japan

\*Corresponding Author: [theerapol@mju.ac.th](mailto:theerapol@mju.ac.th), [maruyama@photon.t.u-tokyo.ac.jp](mailto:maruyama@photon.t.u-tokyo.ac.jp)

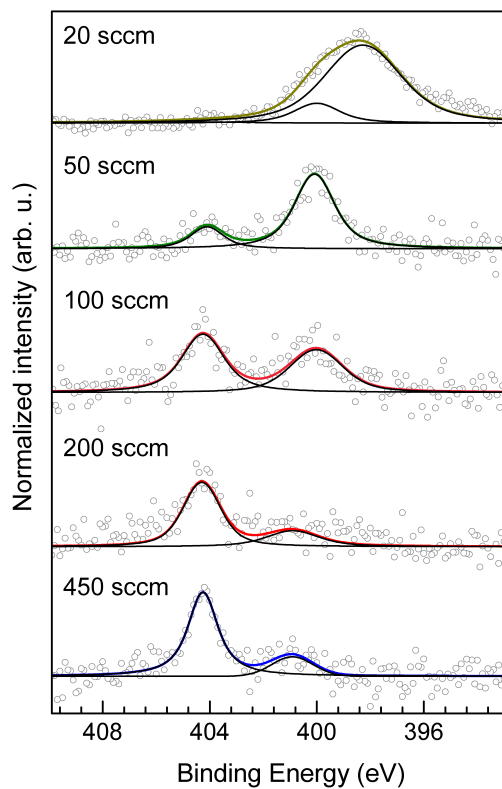

**Fig. S1** The N1s core level obtained from XPS spectra of N-doped SWCNTs synthesized from various flow rates.

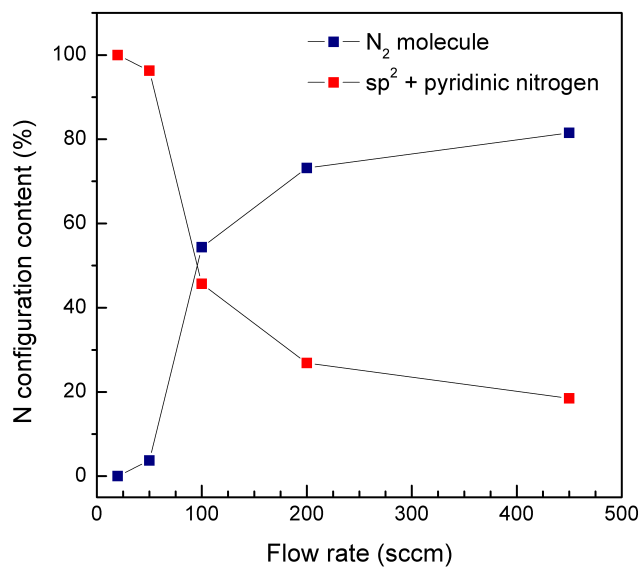

**Fig. S2** Nitrogen content of each configuration obtained from the decomposed N1s core level as a function of C/N feedstock flow rate during the growth.

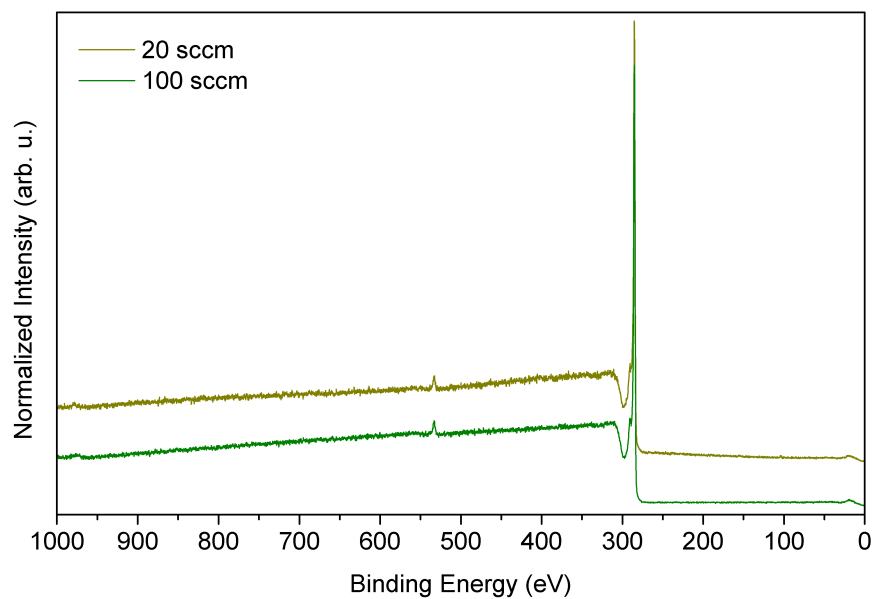

**Fig. S3** The survey scan of XPS spectra of N-doped SWCNTs synthesized from the flow rate of 20 sccm and 100 sccm.

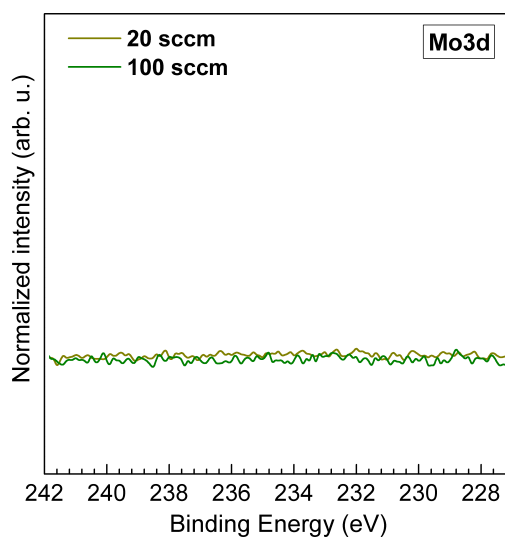

**Fig. S4** The Mo 3d core level obtained from XPS spectra of N-doped SWCNTs synthesized from the flow rate of 20 sccm and 100 sccm.
